# Supplementary figures and images for: INO80 governs superenhancer-mediated oncogenic transcription and tumor growth in melanoma
Source: PubMed Central journal article supplement — Genes Dev. 2016 Jun 15;30(12):1440–53. doi: 10.1101/gad.277178.115 (PMC4926866; doi:10.1101/gad.277178.115), 2016-06-15

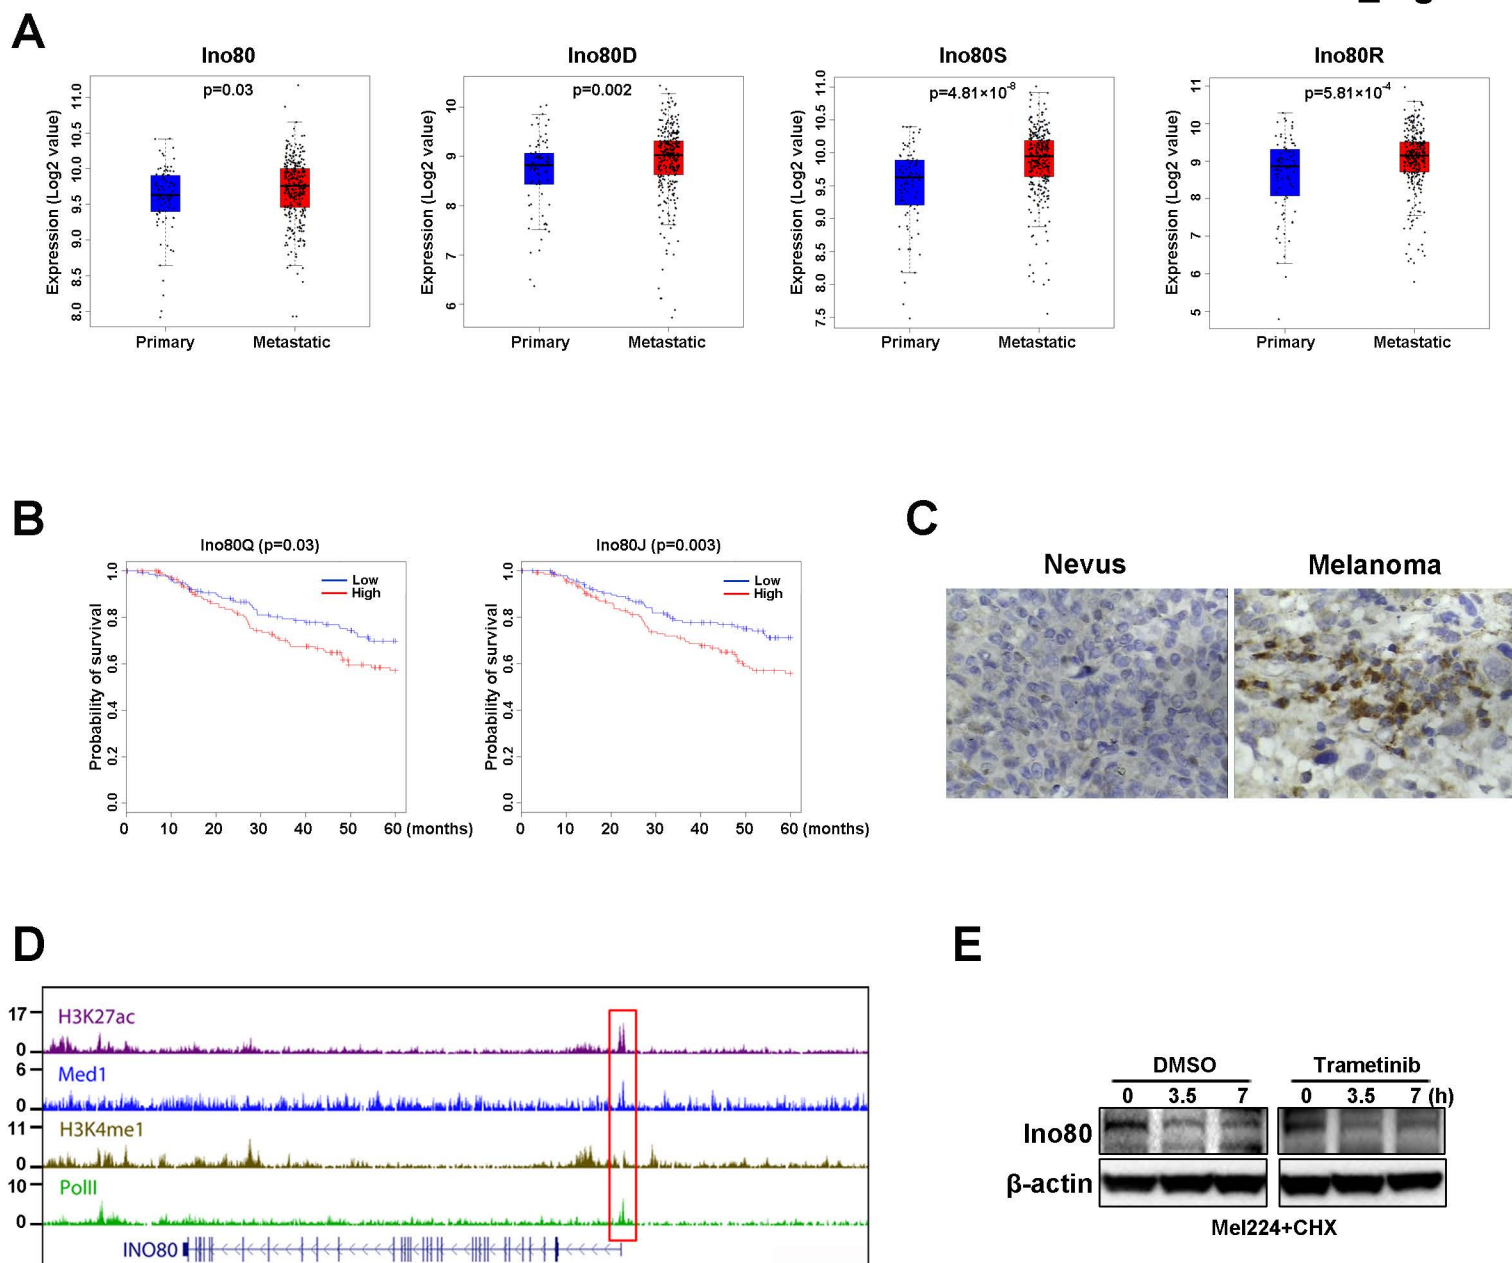

Figure S1

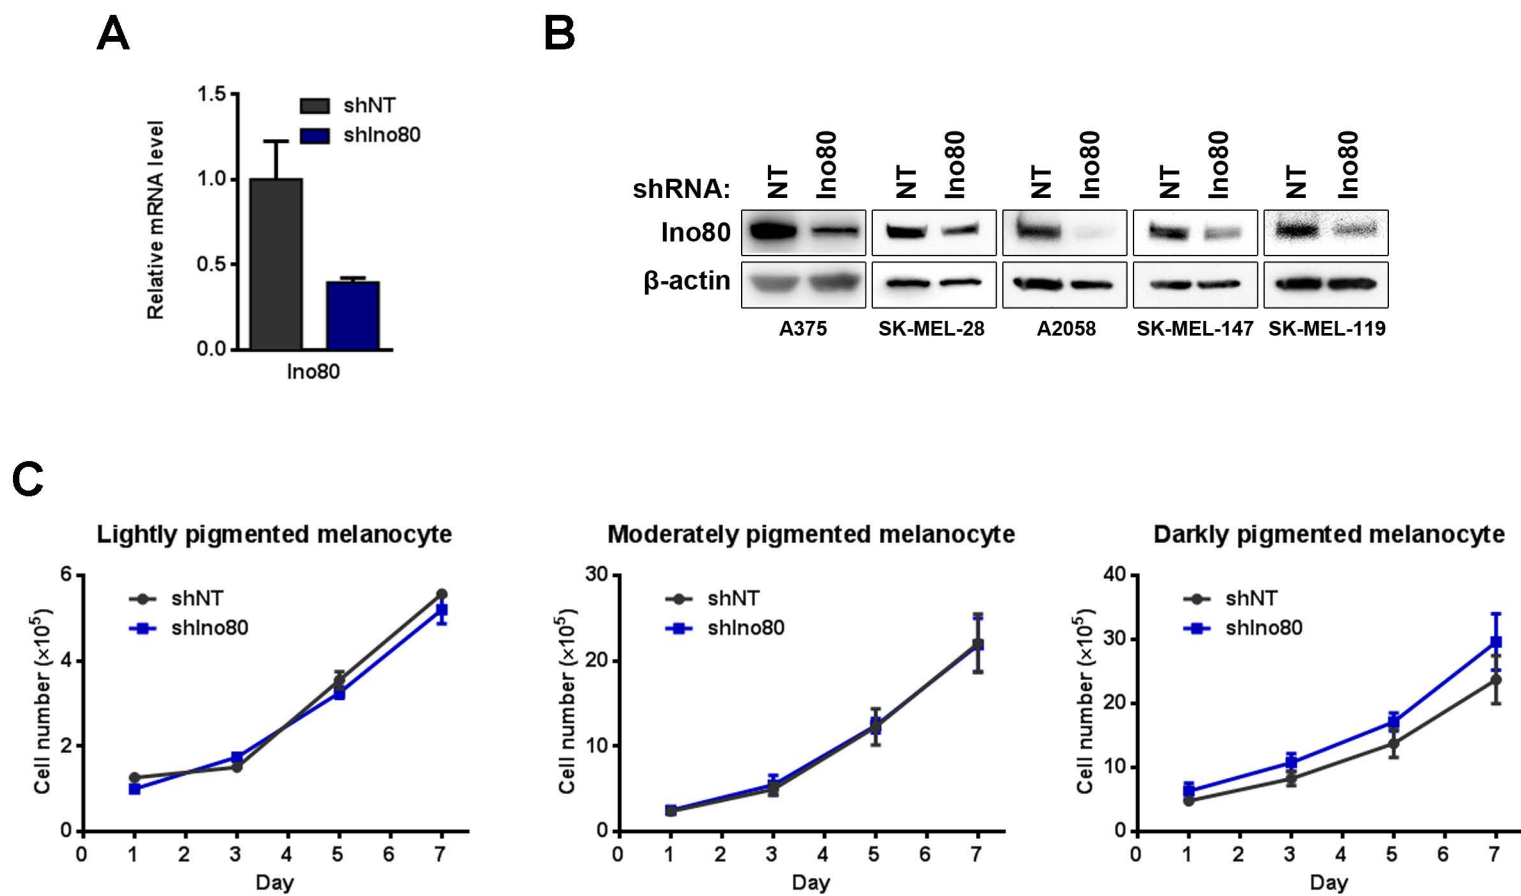

Figure S2

**A**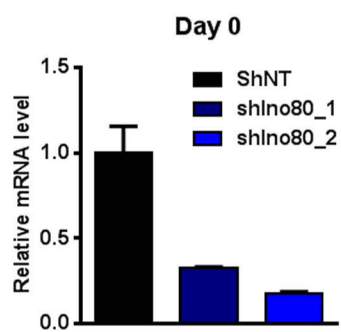**B**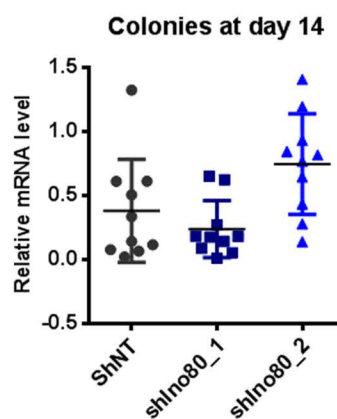**C**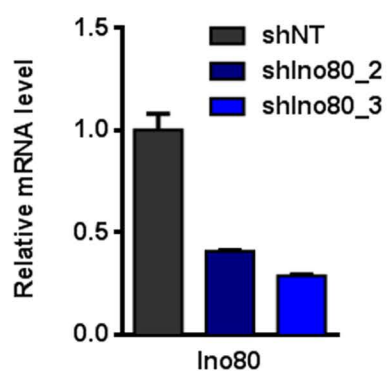**D**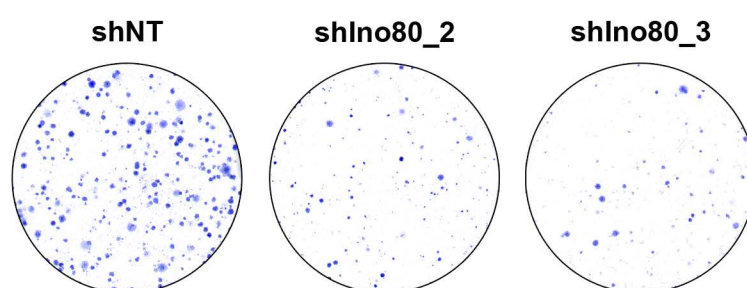**E**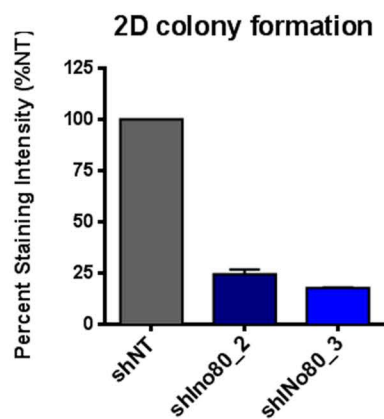**F**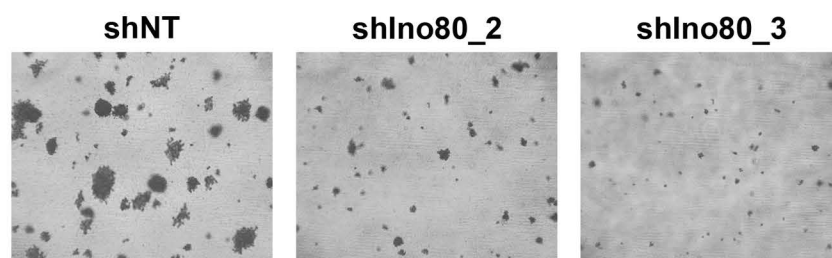**Figure S3**

**A**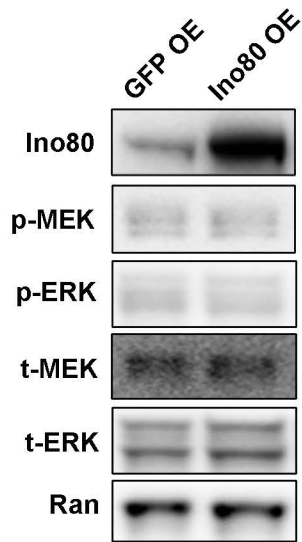**B**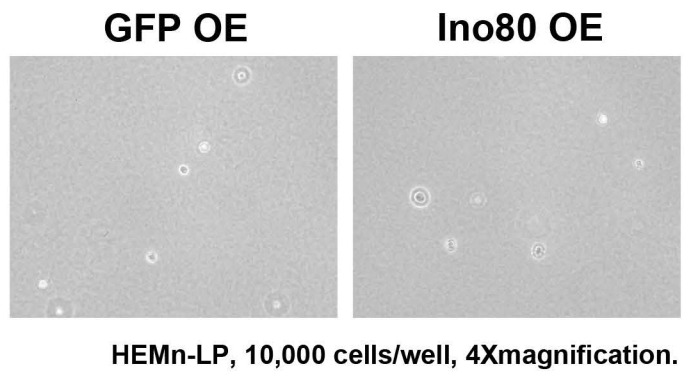**Figure S4**

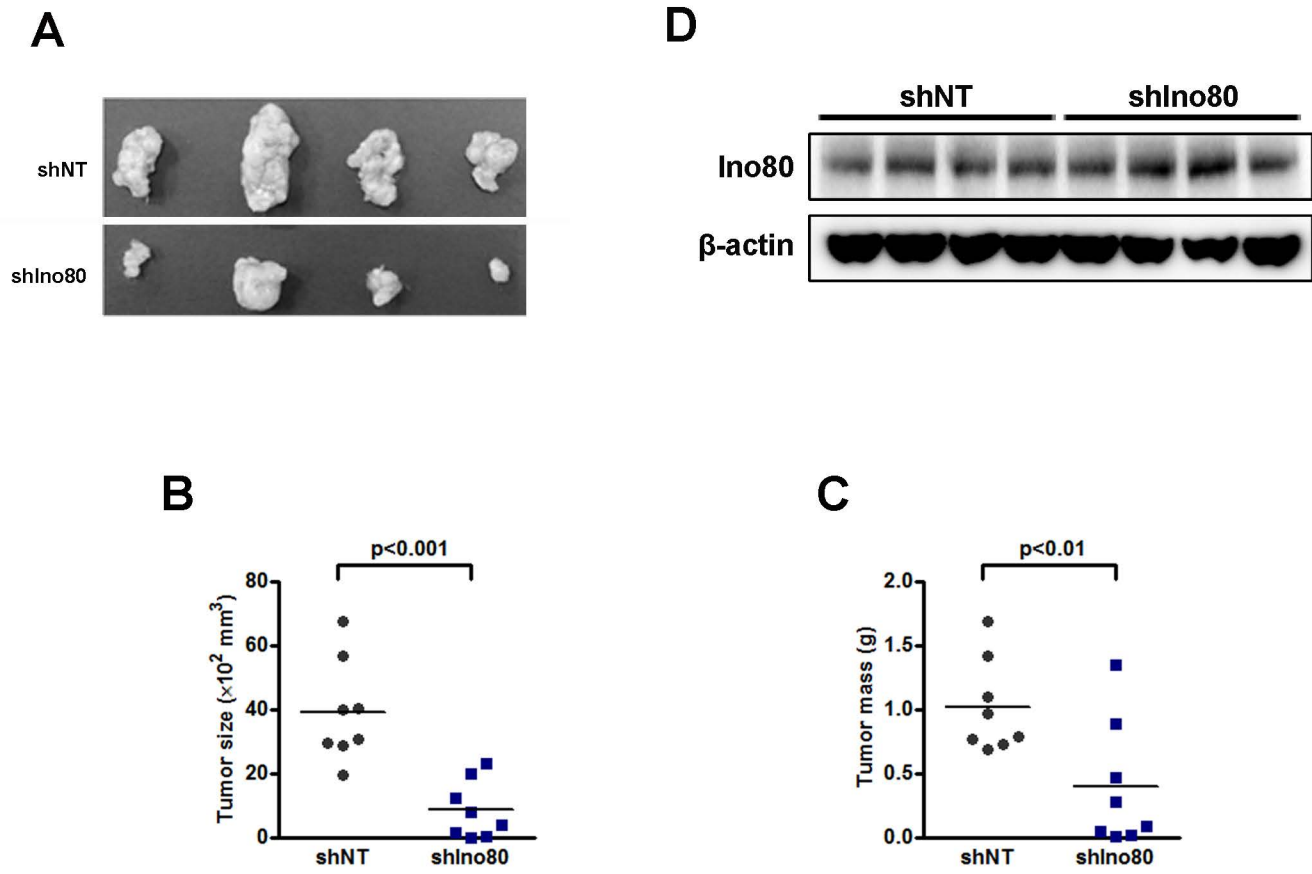

Figure S5

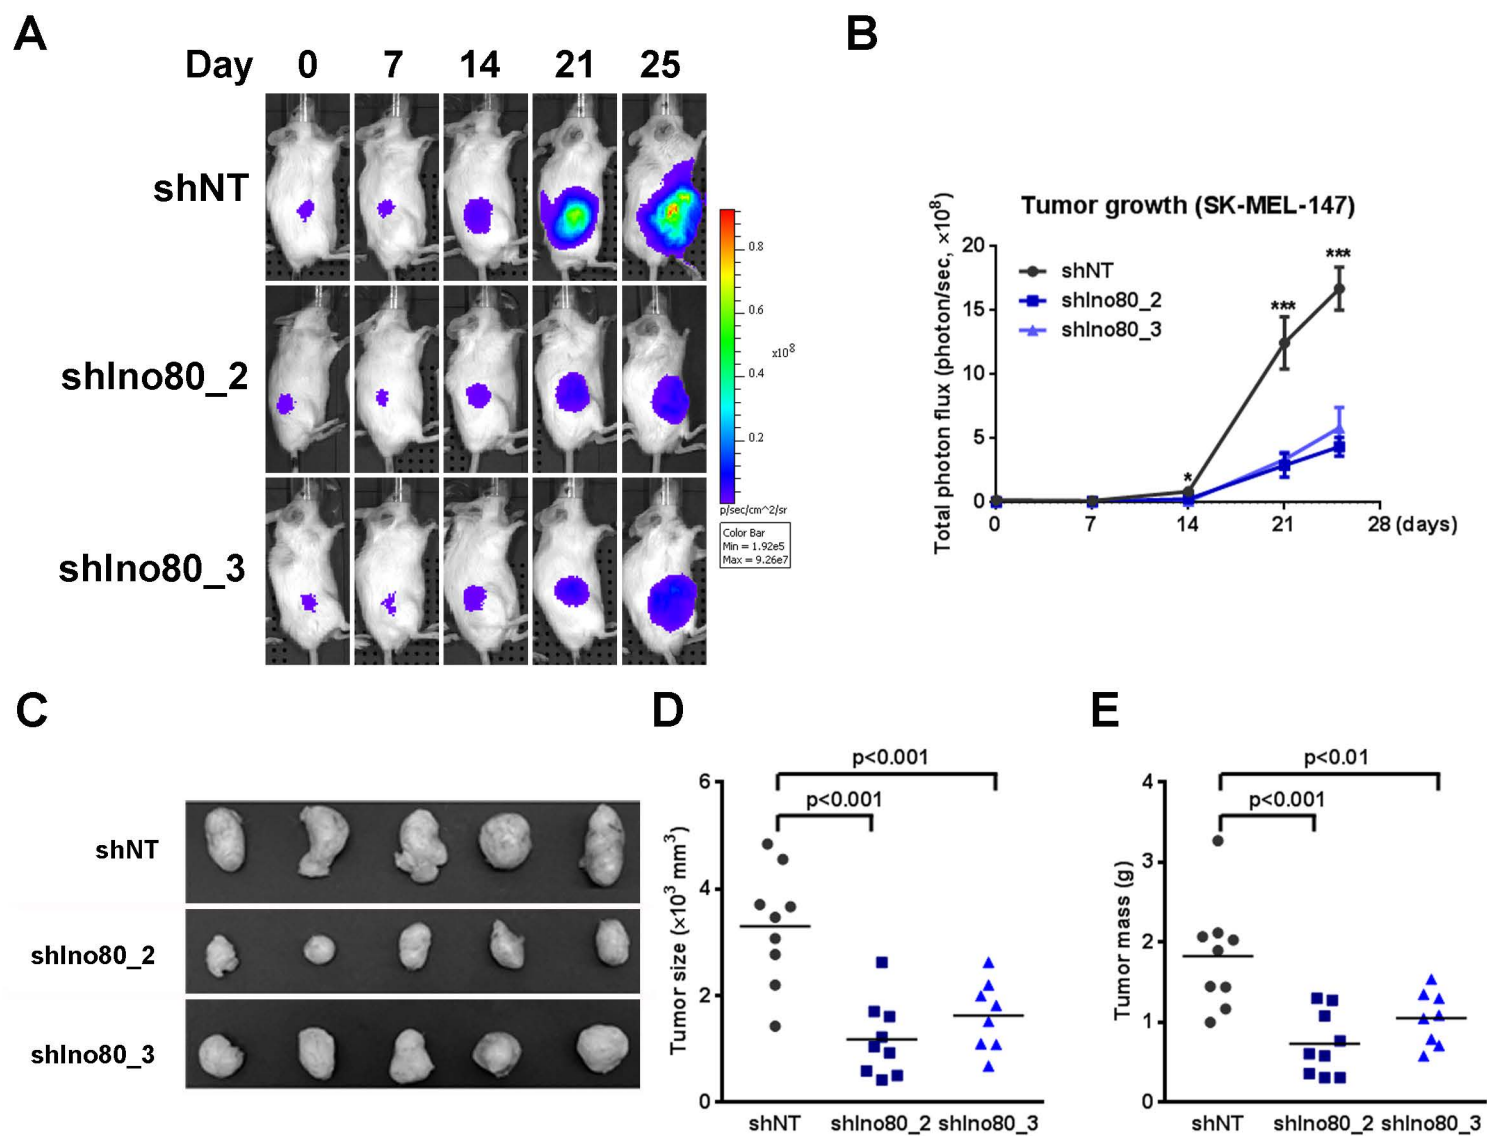

Figure S6

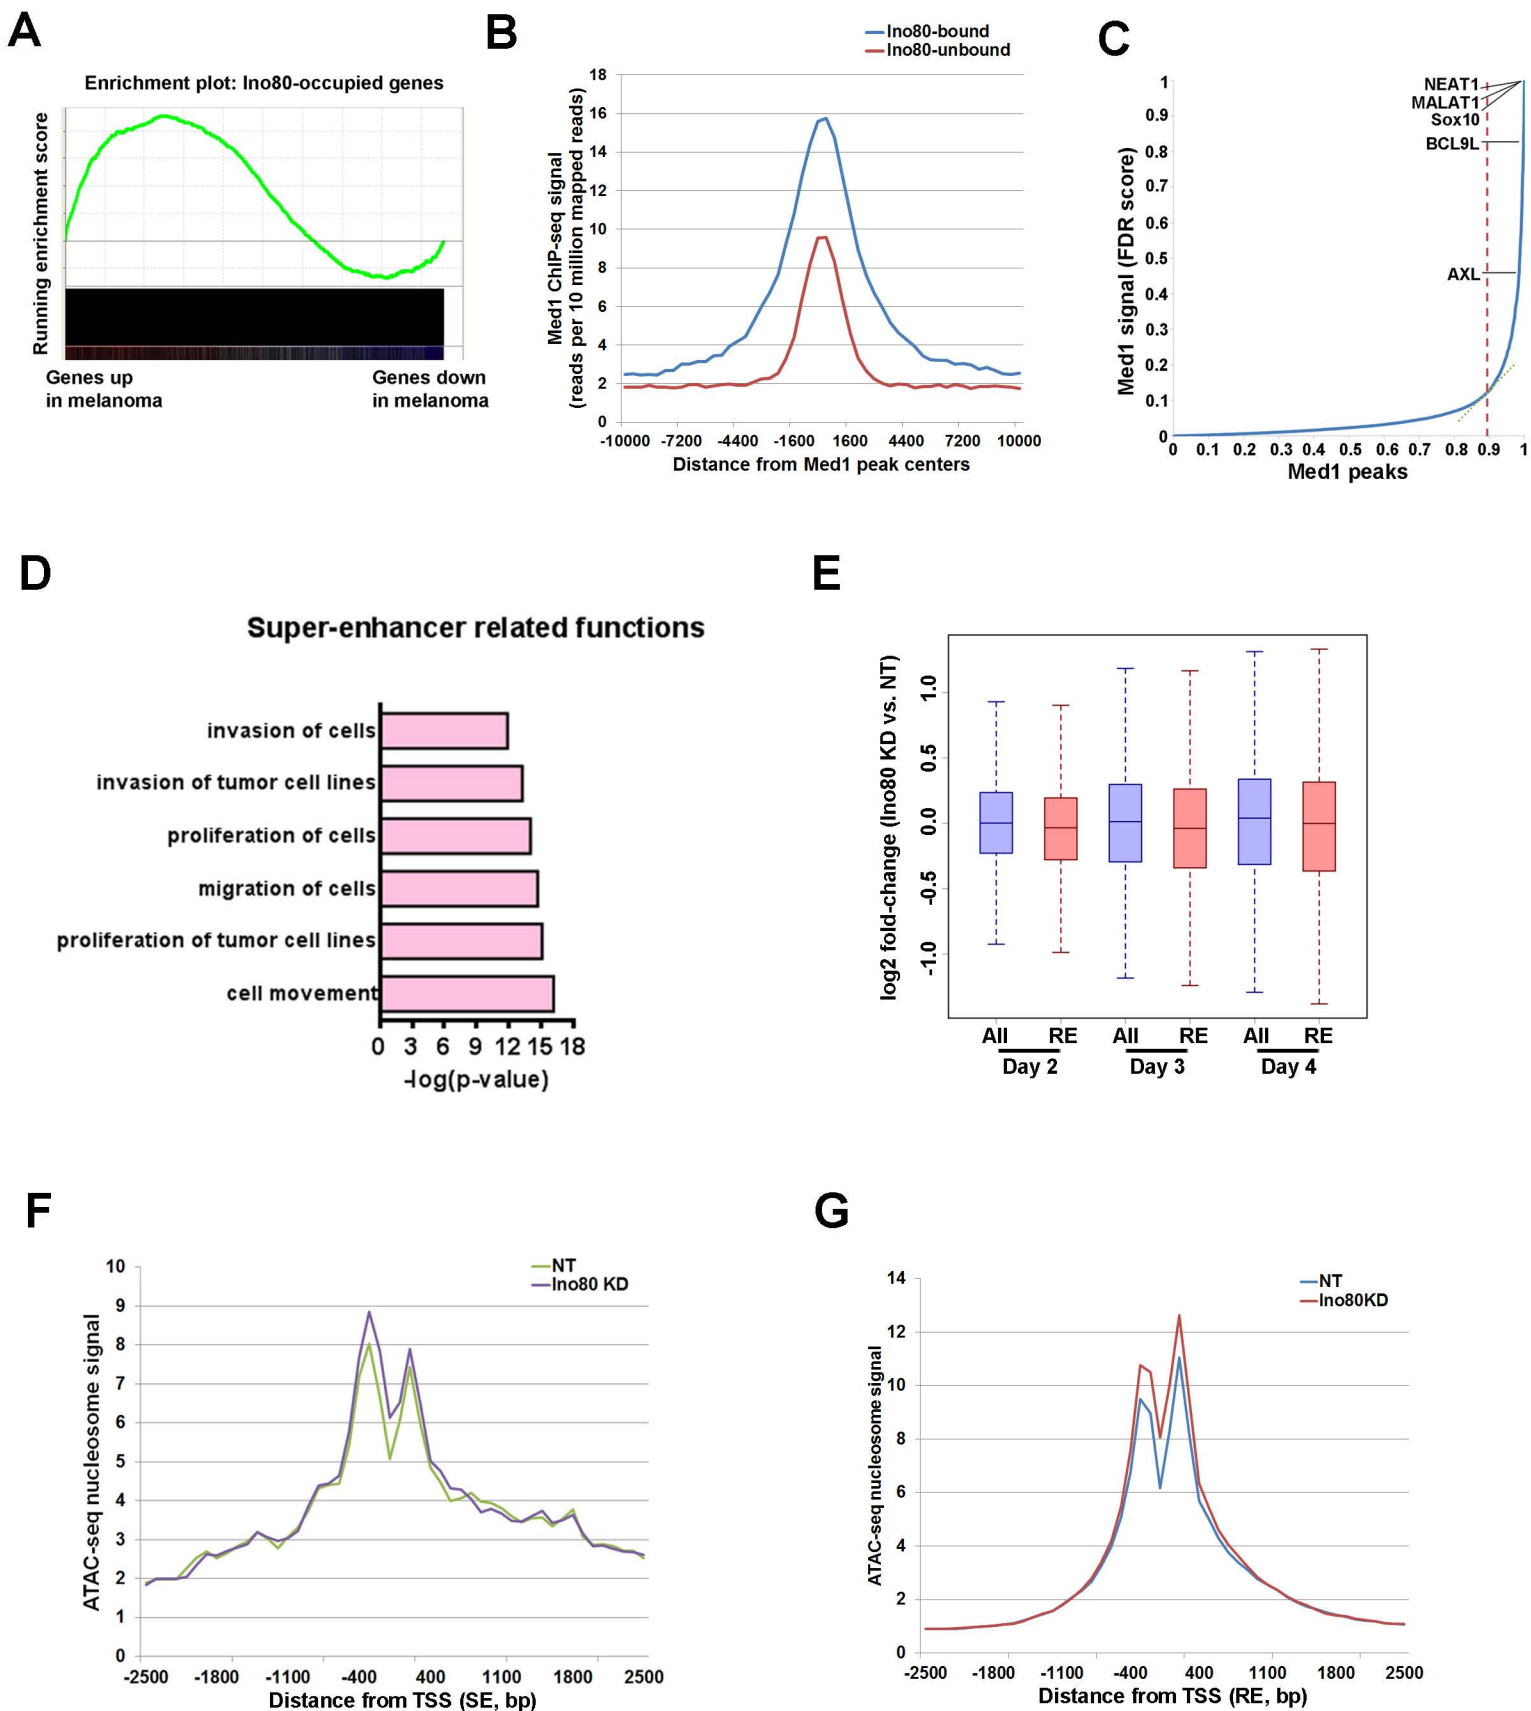

Figure S7

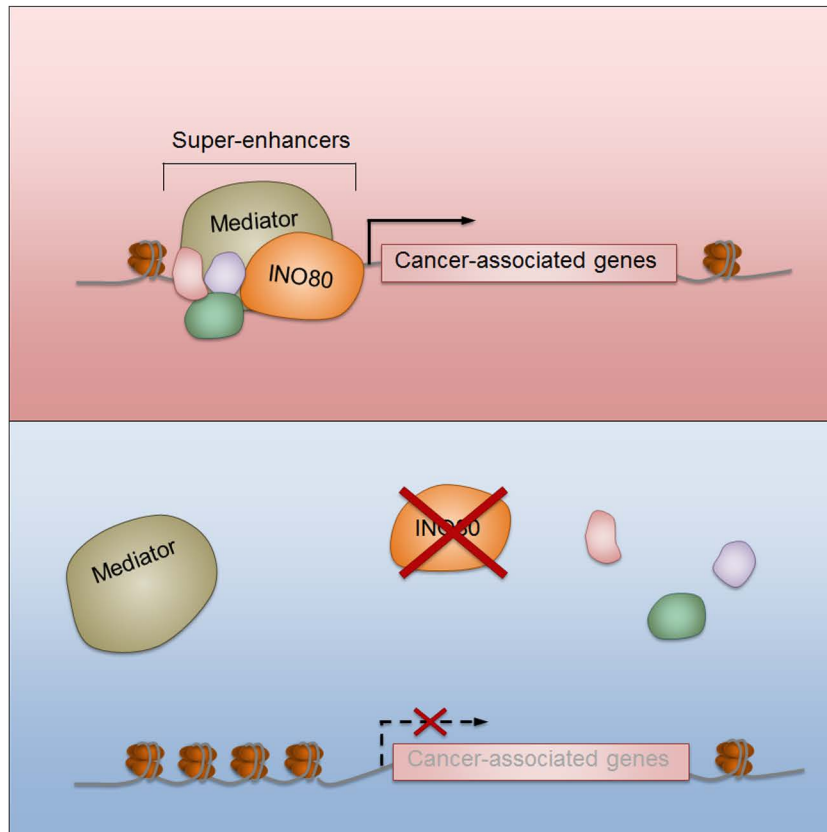

**Figure S8**

Supplement: supp_30.12.1440_Supplemental_Figures.pdf [file supp_30.12.1440_Supplemental_Figures.pdf]
